# Supplementary material for: Structure and function of Parkin E3 ubiquitin ligase reveals aspects of RING and HECT ligases
Source: PubMed Central journal article supplement (PMC3709503; doi:10.1038/ncomms2982), 2013-06-17
Supplement: ncomms2982-s1.pdf [file ncomms2982-s1.pdf]

## SUPPLEMENTARY INFORMATION

### Structure and Function of Parkin E3 Ubiquitin Ligase Reveals Aspects of RING and HECT Ligases

Riley, B.E.<sup>1</sup>, Lougheed, J.C.<sup>1</sup>, Callaway, K.<sup>1</sup>, Velasquez, M.<sup>1</sup>, Brecht, E.<sup>1</sup>, Nguyen, L.<sup>1</sup>, Shaler, T.<sup>2</sup>, Walker, D.<sup>1</sup>, Yang, Y.<sup>1</sup>, Regnstrom, K.<sup>1</sup>, Diep, L.<sup>1</sup>, Zhang, Z.<sup>1</sup>, Chiou, S.<sup>1</sup>, Bova, M.<sup>1</sup>, Artis, R.A.<sup>1</sup>, Yao, N.<sup>1</sup>, Baker, J.<sup>1</sup>, Yednock, T.<sup>1</sup>, Johnston, J.A.<sup>\*1</sup>

<sup>1</sup> Elan Pharmaceuticals, South San Francisco, CA, 94080, USA

<sup>2</sup> SRI International, Menlo Park, CA, 94025, USA

\* These authors contributed equally to this work

\* To whom correspondence should be addressed, Jennifer Johnston, [jenniferjohnston@e3xbio.com](mailto:jenniferjohnston@e3xbio.com)

a

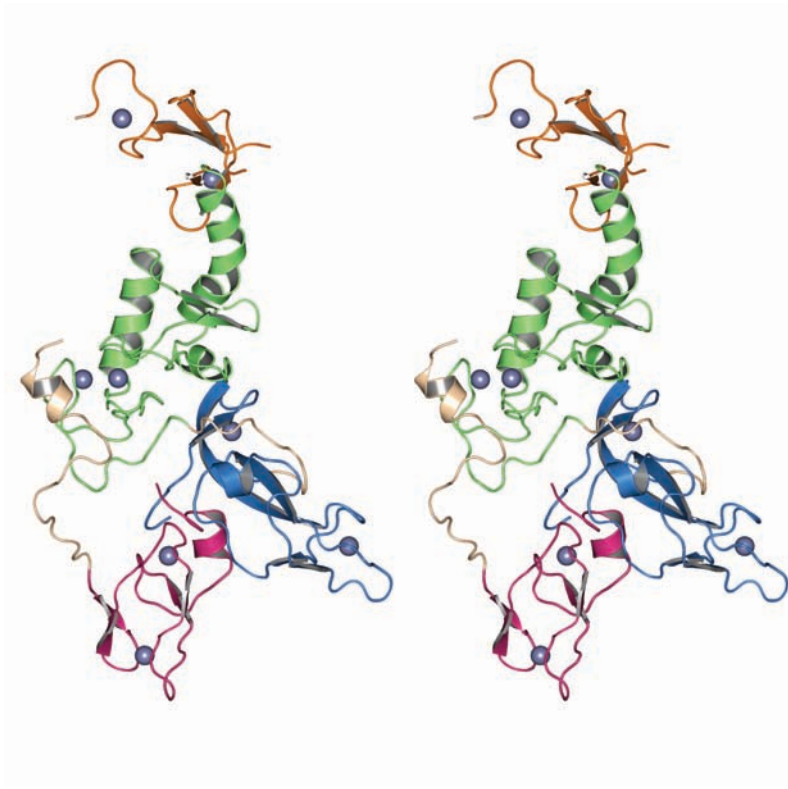

b

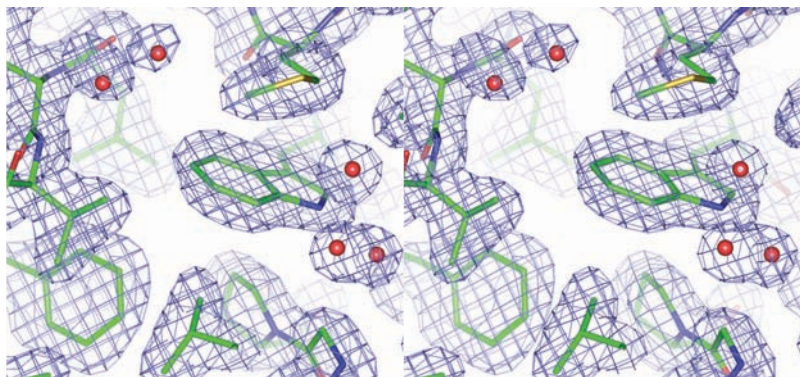

**Supplementary Figure S1** Stereo ribbon diagram of Parkin R0RBR-P223 and electron density map of R0:R2.

**a**, Stereo ribbon diagram of Parkin R0RBR **b**, The MAD phased map of Parkin R0RBR P223 is of high quality.

A representative view of the electron density, contoured at  $1\sigma$ , is shown at the R0:R2 interface. For orientation, Tryptophan 462 is in the middle of the image.

**a**

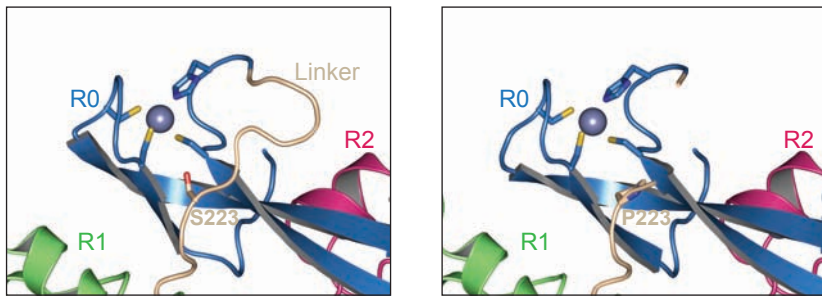

**Supplementary Figure S2** Comparison of Parkin R0RBR-S223 and Parkin R0RBR-P223.

**a**, The loop containing residue 223 is ordered in Parkin R0RBR-S223 while it is disordered in the Parkin R0RBR-P223 structure. The nearby bound Zn site is well ordered in the S223 structure while it appears to have more than one conformation in the P223 structure as indicated by the diffuse electron density and higher crystallographic B-factors for this region. The same dominant conformation was modeled in both structures. The coordination residues for the nearby bound Zn (grey spheres) are shown in sticks.

**a** RING 0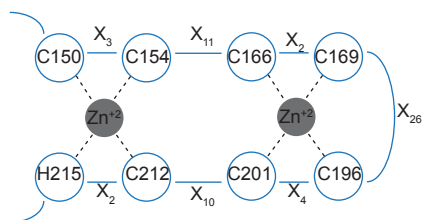**b** RING 1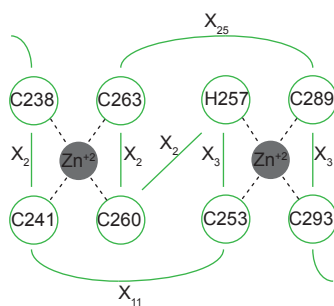Parkin  
RNF144A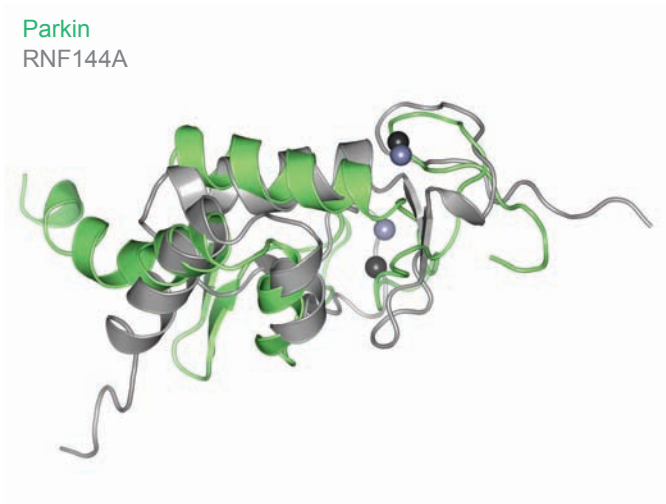**c** IBR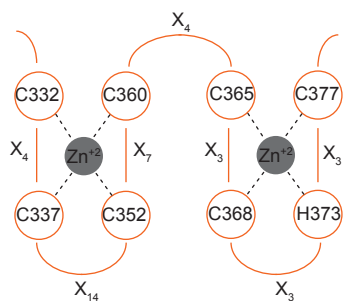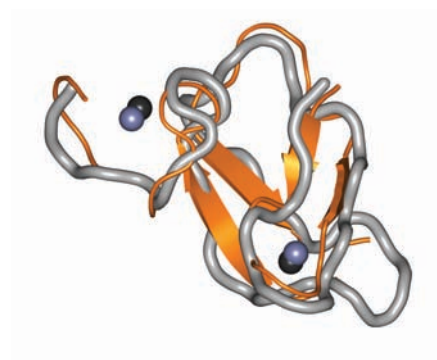**d** RING 2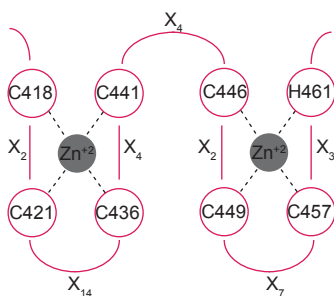Parkin  
HOIP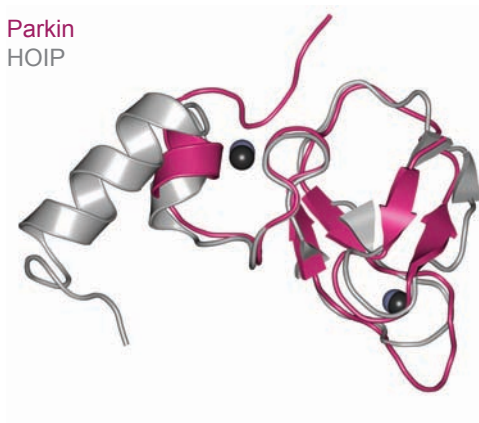

**Supplementary Figure S3** Cartoon representations of RING domains and identification of Zn coordinating residues.

**a**, R0 domain is a previously unobserved fold. **b**, The R1 domains of Parkin (green) and RNF144A (pdb 1WIM, grey) are similar. **c**, The IBR domain from our crystal structure (orange) agrees with the IBR domain solved by NMR (pdb 2JMO, grey). **d**, The Parkin R2 domain (pink) is similar to the NMR structure of the IBR domain of HOIP (pdb 2CT7, grey).

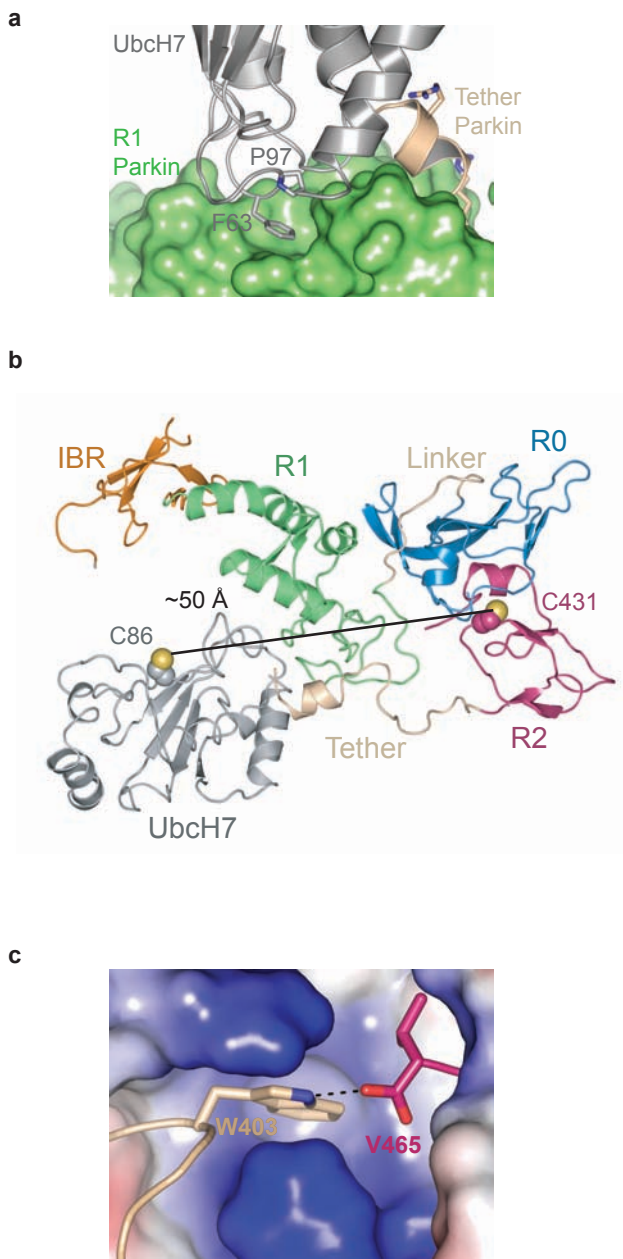

**Supplementary Figure S4** Superposition of Ubch7 on Parkin R1 domain.

**a**, Ubch7 (grey) was positioned on Parkin-R0RBR by superimposing R1 (green) with the RING domain in the structure of c-Cbl bound to Ubch7 (pdb 1FBV) using the pymol align command; c-Cbl is not shown for clarity. There is compatible binding between the hydrophobic grooves of Parkin R1 and Ubch7 (canonical residues involved in E2 binding, F63 and P97 of Ubch7 are labeled), similar to that previously described<sup>47</sup>.

**b**, The catalytic cysteines of Ubch7 and Parkin-R0RBR are > 50 Å apart in our superposition model and the Parkin tether residues 393-395 (beige) overlap with Ubch7 in the superposition, suggesting that they adopt another conformation in E2 bound R1. Conformational changes and/or oligomerization could bring the catalytic cysteines into proximity for transthiolation. **c**, Electrostatic surface representation around W403 demonstrates that the inside of the pocket is hydrophobic.

a

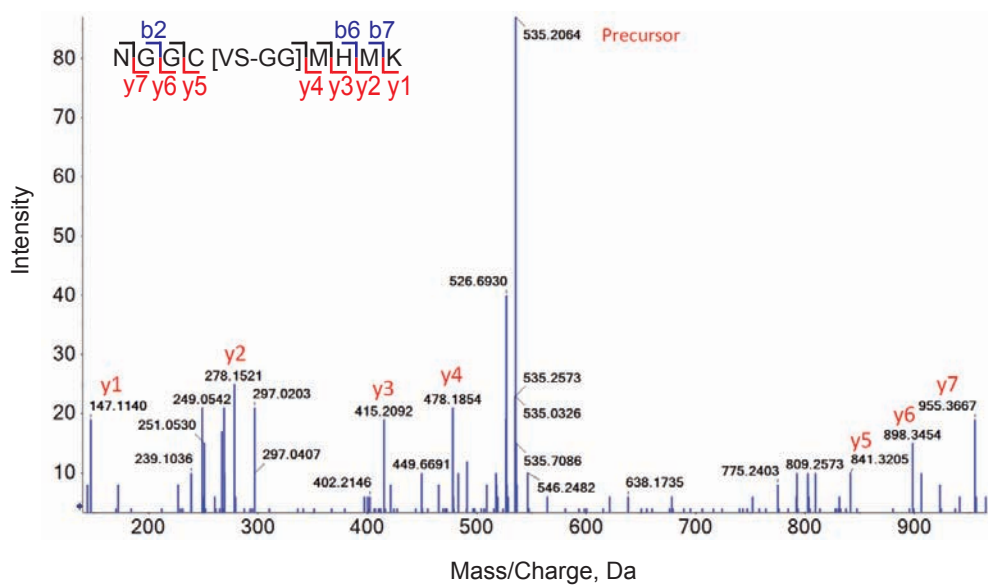

| # | b-ions          | Seq. | Y-ions          | # |
|---|-----------------|------|-----------------|---|
| 1 | 115.0502        | N    |                 | 8 |
| 2 | <b>172.0717</b> | G    | <b>955.3617</b> | 7 |
| 3 | 229.0931        | G    | <b>898.3402</b> | 6 |
| 4 | 524.1592        | C#   | <b>841.3187</b> | 5 |
| 5 | 655.1997        | M    | <b>546.2527</b> | 4 |
| 6 | <b>792.2586</b> | H    | <b>415.2122</b> | 3 |
| 7 | <b>923.2991</b> | M    | <b>278.1533</b> | 2 |
| 8 |                 | K    | <b>147.1128</b> | 1 |

C# = Cys + Vinyl Sulfone-GlyGly

b

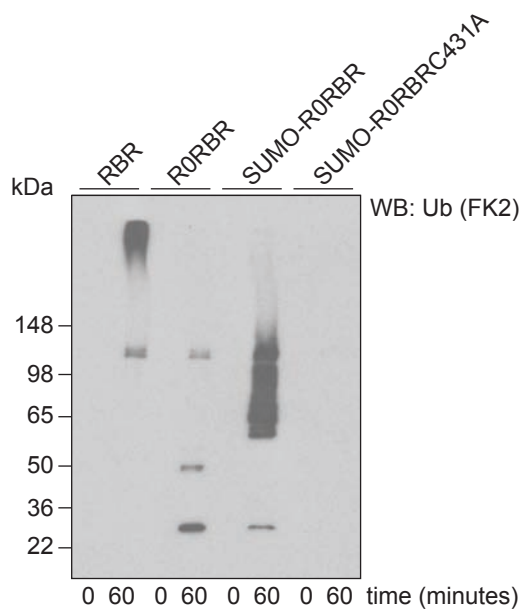

**Supplementary Figure S5** Parkin conjugation to HA-UbVS occurs on C431.

**a**, Mass spectrometry analysis of Parkin HA-UbVS reactions. **b**, Autoubiquitination of various Parkin constructs as monitored with immunoblotting with anti-Ub antibody (FK2).

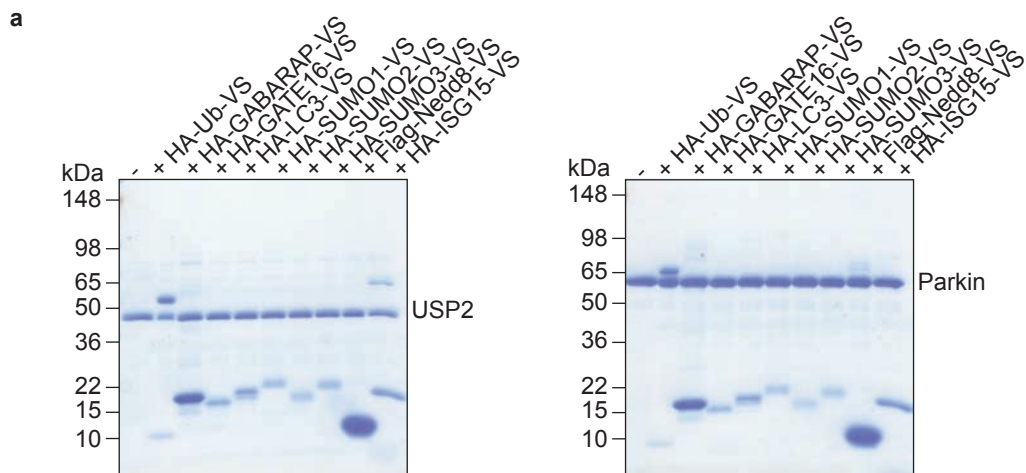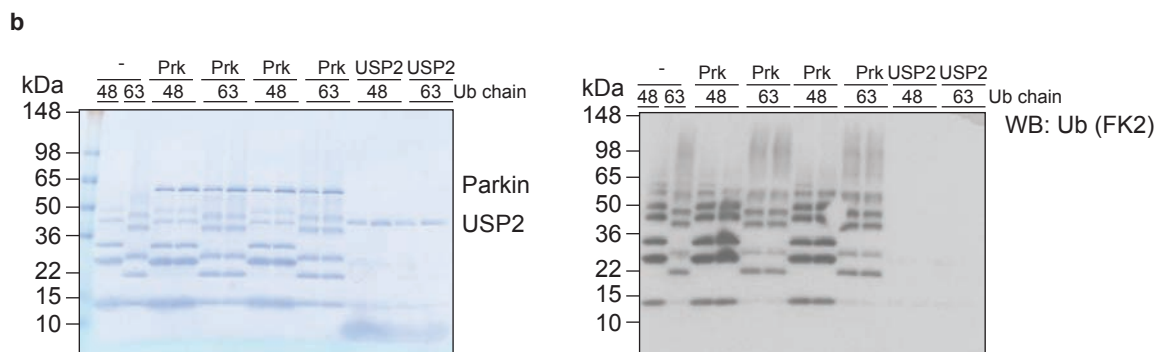

**Supplementary Figure S6** Parkin reactivity with HA-UbVS is specific and Parkin is not a deubiquitinating enzyme (DUB).

**a**, The DUB USP2 reacts with HA-UbVS and HA-IsG15VS (also shown previously<sup>54</sup>), and was used as a positive control. Parkin reacts specifically with HA-UbVS, and to a weak extent NEDD8, and no reactivity with other Ub-like VS probes. **b**, Parkin or USP2 were incubated with pure UbK48 (2-7) or UbK63 (2-7) chains. Reactions were monitored by Coomassie blue or western blot with the Ub antibody FK2. For USP2, Ub chains are completely disassembled whereas Ub chains remained intact when incubated with Parkin.

<sup>54</sup>Catic, A. et al. Screen for ISG15-crossreactive deubiquitinases. *PLoS One* **2**, e679, doi:10.1371/journal.pone.0000679 (2007).





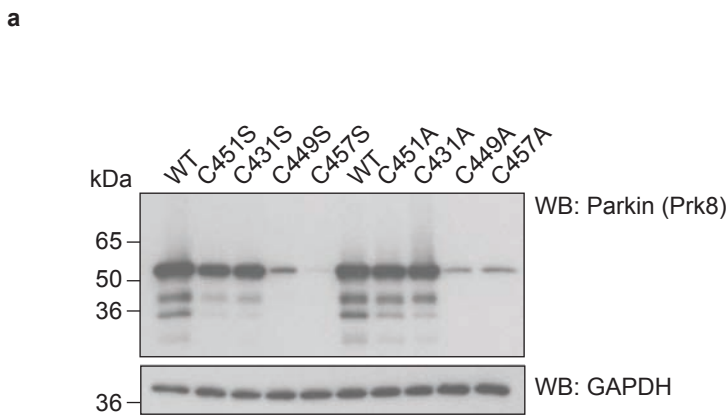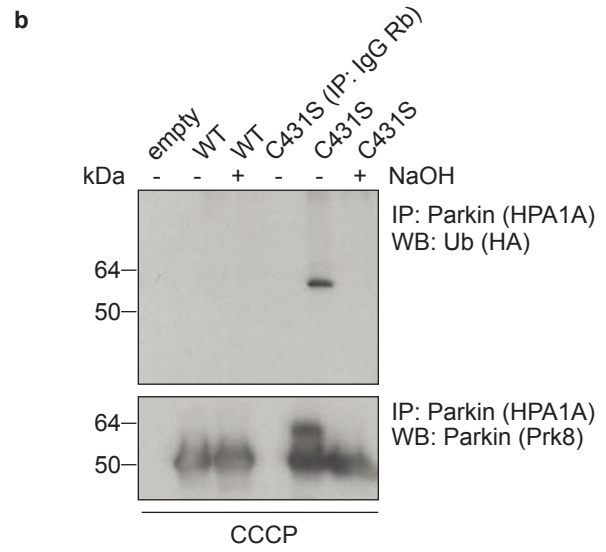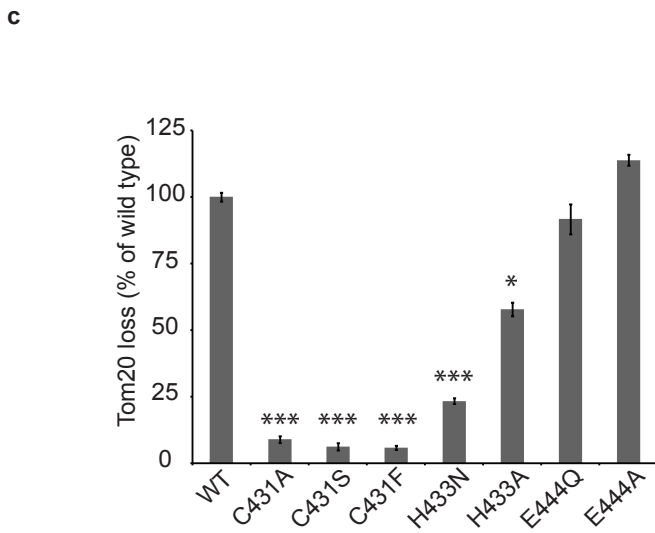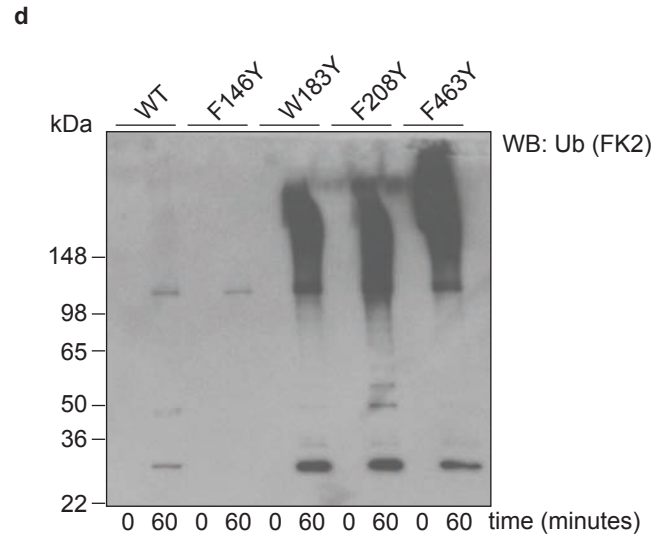

**Supplementary Figure S8** Parkin's catalytic machinery.

**a**, Soluble levels of untagged Parkin cysteine (C) to serine (S) or alanine (A) mutants in transfected HeLa cells. GAPDH was used as the loading control. **b**, Immunoprecipitation (IP) of Parkin followed by western blotting (WB) with HA to demonstrate the ~8 kDa shift is HA-Ub. **c**, Parkin-induced Tom20 loss after CCCP requires H433 but not E444. Data shown is representative of four independent experiments (standard error represents s.e.m.). The significance levels were determined using the heteroscedastic Student's t-Test with two-tailed distribution. Triple asterisk denotes  $P < .005$ , double asterisk denotes  $P < .01$  and single asterisks denote  $P < .05$ . C431A  $P = .002$ , C431S  $P = .002$ , C431F  $P = .002$ , H433N  $P = .003$ , H433A  $P = .016$ . **d**, Parkin R0:R2 mutants activity for various R0:R2 mutants was monitored by immunoblotting with anti-Ub antibody (FK2).

|                          |                                 |                  |                  |
|--------------------------|---------------------------------|------------------|------------------|
| Crystal                  | Parkin-R0RBR-P223 <sup>a</sup>  |                  |                  |
| <b>Data Collection</b>   |                                 |                  |                  |
| Space Group              | C222 <sub>1</sub>               |                  |                  |
| Unit cell: a, b, c (Å)   | 86.96, 133.2, 65.39             |                  |                  |
|                          | HiRes                           | Peak (Zn)        | Remote(Zn)       |
| Wavelength (Å)           | 1.1159                          | 1.2831           | 1.2699           |
| Resolution (Å)           | 44-1.58(1.62-1.58) <sup>b</sup> | 50-1.8(1.85-1.8) | 50-1.8(1.85-1.8) |
| Rsym                     | 0.078(0.99)                     | 0.107(-)         | 0.113(-)         |
| I/σI                     | 11.0(1.6)                       | 14.8(1.0)        | 15.4(1.3)        |
| Completeness (%)         | 99.5(99.8)                      | 95.1(63.6)       | 97.3(70.5)       |
| Redundancy               | 6.9(6.9)                        | 14.3(10.4)       | 15.6(11.6)       |
| <b>Refinement</b>        |                                 |                  |                  |
| Resolution (Å)           | 44-1.58                         |                  |                  |
| No. reflections          | 52033                           |                  |                  |
| Rwork/Rfree <sup>c</sup> | 0.205/0.245                     |                  |                  |
| Number of atoms          |                                 |                  |                  |
| Protein                  | 2403                            |                  |                  |
| Ligand/ion               | 9                               |                  |                  |
| Water                    | 267                             |                  |                  |
| B-factors                |                                 |                  |                  |
| Protein                  | 27.0                            |                  |                  |
| Ligand/ion               | 26.7                            |                  |                  |
| Water                    | 34.5                            |                  |                  |
| R.m.s. deviations        |                                 |                  |                  |
| Bond lengths (Å)         | 0.025                           |                  |                  |
| Bond angles              | 2.26°                           |                  |                  |

<sup>a</sup> One crystal was used for all data sets. The Peak and Remote data sets were used to determine experimental phases and the final structure was refined against a high resolution (HiRes) data set.

<sup>b</sup> Values in parentheses indicate the highest resolution shell

<sup>c</sup>R<sub>free</sub> was calculated with a randomly chosen 5% of the data for the P223 structure and this same set was used for the S223 structure

**Supplementary Table S1** Data collection and refinement from the crystallography studies of Parkin R0RBR P223.

|                          |                                 |
|--------------------------|---------------------------------|
| Crystal                  | Parkin-R0RBR-S223 <sup>a</sup>  |
| <b>Data Collection</b>   |                                 |
| Space Group              | C222 <sub>1</sub>               |
| Unit cell: a, b, c (Å)   | 87.11, 133.9, 66.21             |
| Resolution (Å)           | 17-2.00(2.12-2.00) <sup>b</sup> |
| Rsym                     | 0.111(0.398)                    |
| I/σI                     | 12.1(3.6)                       |
| Completeness (%)         | 82.3(36.3) <sup>c</sup>         |
| Redundancy               | 6.1(5.5)                        |
| <b>Refinement</b>        |                                 |
| Resolution (Å)           | 17-2.00                         |
| No. reflections          | 21783                           |
| Rwork/Rfree <sup>d</sup> | 0.181/0.215                     |
| Number of atoms          |                                 |
| Protein                  | 2405                            |
| Ligand/ion               | 8                               |
| Water                    | 263                             |
| B-factors                |                                 |
| Protein                  | 20.6                            |
| Ligand/ion               | 17.7                            |
| Water                    | 23.3                            |
| R.m.s. deviations        |                                 |
| Bond lengths (Å)         | 0.019                           |
| Bond angles              | 1.84°                           |

<sup>a</sup> One crystal was used

<sup>b</sup> Values in parentheses indicate the highest resolution shell

<sup>c</sup> Completeness was 95.6% to 2.24Å at the edge of the detector

<sup>d</sup>R<sub>free</sub> was calculated with a randomly chosen 5% of the data for the P223 structure and this same set was used for the S223 structure

**Supplementary Table S2** Data collection and refinement from the crystallography studies of Parkin R0RBR S223.
